# Supplementary material
Source: Springer Nature journal article supplement (https://www.springermedizin.de/resource/supplementary/12985_2009_678_MOESM6_ESM.pdf/9608252)

dN/dS = 1.142; 46%

dN/dS = 0.625; 54%

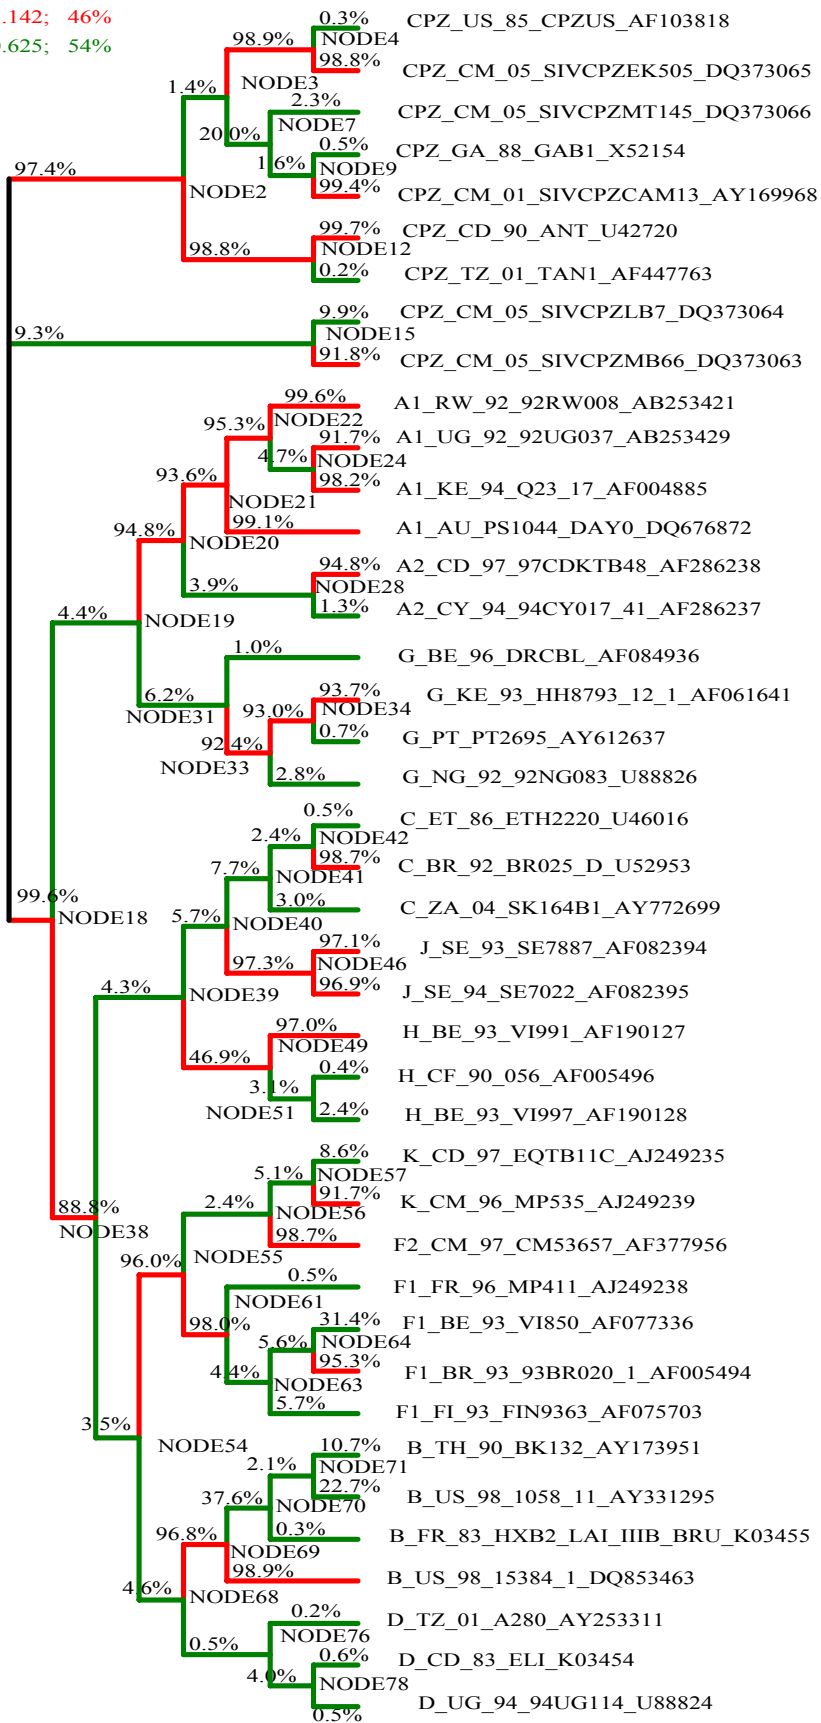

Supplement: MOESM6 [file 9608252]
